1 **Pan-GWAS of *Streptococcus agalactiae* highlights lineage-specific genes associated with**  
2 **virulence and niche adaptation**

3

4 Andrea Gori<sup>1</sup>, Odile Harrison<sup>2</sup>, Ethwako Mlia<sup>3,5</sup>, Yo Nishihara<sup>3</sup>, Jacqueline Chinkwita-Phiri<sup>3</sup>,  
5 Macpherson Mallewa<sup>4</sup>, Queen Dube<sup>5</sup>, Todd D Swarthout<sup>3,6</sup>, Angela H Nobbs<sup>7</sup>, Martin  
6 Maiden<sup>2</sup>, Neil French<sup>3,8</sup>, Robert S Heyderman<sup>1,3</sup>

7

8 <sup>1</sup> NIHR Mucosal Pathogens Research Unit, Division of Infection and Immunity, University  
9 College London, 5 University Street, WC1E 6JF UK London, United Kingdom

10 <sup>2</sup> Department of Zoology, University of Oxford, The Peter Medawar Building for Pathogen  
11 Research, OX1 3SY, Oxford, United Kingdom

12 <sup>3</sup> Malawi-Liverpool-Wellcome Trust Clinical Research Programme, College of Medicine,  
13 University of Malawi, Blantyre, Malawi

14 <sup>4</sup> University of Malawi, College of Medicine, Chichiri, Blantyre 3, Malawi

15 <sup>5</sup> Queen Elizabeth Central Hospital, P.O. Box 95, Blantyre, Malawi

16 <sup>6</sup> Liverpool School of Tropical Medicine, Clinical Sciences, Pembroke Place, L3 5QA,  
17 Liverpool, United Kingdom

18 <sup>7</sup> Bristol Dental School, University of Bristol, Lower Maudlin Street, BS1 2LY, Bristol,  
19 United Kingdom

20 <sup>8</sup> Department of Clinical Infection, Institute of Infection and Global Health, University of  
21 Liverpool, 8 West Derby Street, L69 7BE, Liverpool, United Kingdom

22

23

24 **Keywords:** *Streptococcus agalactiae*, pangenome, GWAS, population structure, bacterial  
25 phylogeny, virulence

26

27

28

29

30

31

32

33

34

35

36

37

38

39 **ABSTRACT**

40 *Streptococcus agalactiae* (Group B streptococcus, GBS) is a coloniser of the gastrointestinal  
41 and urogenital tracts, and an opportunistic pathogen of infants and adults. The worldwide  
42 population of GBS is characterised by Clonal Complexes (CCs) with different invasive  
43 potentials. CC17 for example, is a hypervirulent lineage commonly associated with neonatal  
44 sepsis and meningitis, while CC1 is less invasive in neonates and more commonly causes  
45 invasive disease in adults with co-morbidities. The genetic basis of GBS virulence and to  
46 what extent different CCs have adapted to different host environments remain uncertain. We  
47 have therefore applied a pan-genome wide association study approach to 1988 GBS strains  
48 isolated from different hosts and countries. Our analysis identified 279 CC-specific genes  
49 associated with virulence, disease, metabolism and regulation of cellular mechanisms that  
50 may explain the differential virulence potential of particular CCs. In CC17 and CC23 for  
51 example, we have identified genes encoding for pilus, quorum sensing proteins, and proteins  
52 for the uptake of ions and micronutrients which are absent in less invasive lineages.  
53 Moreover, in CC17, carriage and disease strains were distinguished by the allelic variants of  
54 21 of these CC-specific genes. Together our data highlight the lineage-specific basis of GBS  
55 niche adaptation and virulence, and suggest that human-associated GBS CCs have largely  
56 evolved in animal hosts before crossing to the humans and then spreading clonally.

57  
58  
59  
60  
61  
62  
63  
64  
65  
66  
67  
68  
69  
70  
71  
72  
73  
74  
75  
76  
77  
78  
79

## 80 INTRODUCTION

81 *Streptococcus agalactiae* (Group B *Streptococcus*, GBS) forms part of the normal  
82 gastrointestinal and urogenital microbiota, occasionally associated with causing life-  
83 threatening invasive disease in infants, pregnant women and adults with co-morbidities  
84 [Shabayek and Spellerberg, 2018]. Since the 1970s, GBS has been reported as one of the  
85 leading causes of neonatal mortality and morbidity in the US [Dermer, *et al.*, 2004] but it is  
86 increasingly recognised that the burden is greatest in low-to-middle income countries. In sub-  
87 Saharan Africa, for example, where up to 30 percent of women carry GBS asymptotically,  
88 the incidence of invasive GBS disease in neonates has been reported to be up to 2.1 per 1000  
89 livebirths, with case fatality rates ranging from 13 to 46 percent [Dagneu, *et al.*, 2012;  
90 Heyderman, *et al.*, 2016; Nishihara *et al.*, 2017].

91  
92 In neonates, early-onset disease (EOD) in the first week of life typically presents as  
93 pneumonia or sepsis [Edmond *et al.*, 2012, Nishihara *et al.*, 2017]. Late-onset disease (LOD)  
94 develops from 7 days to 3 months after birth, and is frequently characterised by meningitis  
95 leading to chronic neurological damage, seizures, blindness and cognitive impairment in  
96 those that survive [Berardi *et al.*, 2013; Nishihara *et al.*, 2017]. The gastrointestinal tract is  
97 the reservoir for GBS and is the most likely source for maternal vaginal colonisation [Meyn  
98 *et al.*, 2004]. This may lead to GBS transmission before or during birth, potentially leading to  
99 early onset disease in the infant [Nishihara *et al.*, 2017]. The route for late onset colonisation  
100 and disease is less clear: while vertical transmission is still possible, environmental  
101 transmission and acquisition are considered more common [Rajagopal *et al.*, 2009].

102  
103 GBS capsular polysaccharide is a key virulence factor, mediating immune system evasion  
104 [Lemire *et al.*, 2012], and is the basis for serotyping. Ten GBS capsular serotypes have been  
105 described [Slotved *et al.*, 2007]. Serotypes Ia, Ib, II, III, and V account for 98% of human  
106 carriage serotypes isolated globally, although prevalence of each serotype varies by region  
107 [Russell *et al.*, 2017]. Serotype III accounts for 25 to 30% of strains isolated in Europe and  
108 Africa but only 11% of strains isolated in Northern America or Asia. Serotypes VI, VII, VIII,  
109 and IX are frequently isolated in Southern, South-Eastern, and Eastern Asia but are relatively  
110 rare in other parts of the world [Russell *et al.*, 2017]. Multi-locus sequence typing (MLST)  
111 has identified 6 major clonal complexes (CC) in humans: 1,10,17, 19, 23 and 26 [Da Cunha  
112 *et al.*, 2014; Sørensen *et al.*, 2014]. In recent years it has become apparent that some CCs  
113 have a greater potential to cause invasive disease, while others are largely associated with

114 asymptomatic carriage. CCs 1, 23 and 19, for example, are the predominant colonisers of  
115 pregnant women, well adapted to vaginal mucosa with a limited invasive potential in  
116 neonates [Manning *et al.*, 2008; Teatero *et al.*, 2017]. In contrast, CC17 strains, mostly  
117 serotype III, are associated with neonatal sepsis and meningitis, and account for more than  
118 80% of LOD [Lamy *et al.*, 2006; Shabayek and Spellerberg., 2018]. Comparative  
119 phylogenetic analysis of human and bovine GBS strains suggested that CC17 emerged  
120 recently from a bovine ancestor (CC67) and is characterised by limited recombination  
121 [Bisharat *et al.*, 2004]. However, this has been challenged [Shabayek and Spellerberg., 2018],  
122 and the relationship between isolates from these different hosts remains uncertain.

123

124 Colonisation and persistence of GBS in different host niches is dependent upon the ability of  
125 GBS to adhere to the mucosal epithelium [Shabayek and Spellerberg., 2018; Nobbs *et al.*,  
126 2009; Rosini and Margarit, 2015], utilising numerous bacterial adhesins including fibrinogen  
127 binding protein (Fbs), the group B streptococcal C5a peptidase (ScpB) and the GBS  
128 immunogenic bacterial adhesin (BibA) [Landwehr-Kenzel and Henneke, 2014; Cheng *et al.*,  
129 2002; Santi *et al.*, 2006]. Biofilm formation is essential to promoting colonisation, which is  
130 also enhanced by bacterial capsule and type IIa pili [Konto-Ghiorghi *et al.*, 2009; Xia *et al.*,  
131 2015]. Biofilm formation also plays a central role in the phenotype switch from commensal  
132 to pathogen [Patras *et al.*, 2018]. Recently, deletion of the gene for Biofilm regulatory protein  
133 A (BrpA) was shown to impair both the biofilm formation and the ability of the bacterium to  
134 colonise and invade the murine host [Patras *et al.*, 2018]. The expression of these virulence  
135 factors vary by CC, with the Fbs proteins carried by the hypervirulent lineage CC17, for  
136 instance, characterised by specific deletions and frameshift mutations that alter the sequence  
137 or expression rate [Buscetta *et al.*, 2014]. *S. agalactiae* is able to survive both the acidic  
138 vaginal environment and within the blood [Santi *et al.*, 2009]. Transcription analyses have  
139 suggested that this transition is largely mediated by two component system CovRS [Patras *et*  
140 *al.*, 2013; Almeida *et al.*, 2015]. Recently, specific gene substitutions in TCS CovRS have  
141 been identified in disease-adapted CC17 GBS clones [Almeida *et al.*, 2017]. How widespread  
142 these genetic adaptations are amongst CC17 and whether different adaptations confer  
143 enhanced colonisation and disease potential in other CCs is uncertain.

144

145 Here, we report a pan-genome wide association study of genome sequence data from 1988  
146 GBS carriage or invasive disease isolates from different hosts and countries. This revealed  
147 that GBS CCs possessed distinct collections of genes conferring increased potential for

148 persistence including genes associated with carbohydrate metabolism, nutrient acquisition  
149 and quorum-sensing. Within CC17, allelic variants of these crucial genes distinguish carriage  
150 from invasive strains. The differences in the GBS CCs analysed are not geographically  
151 restricted, but may have emerged from an original ancestral GBS strain in animal hosts  
152 before crossing to humans.

153

## 154 **METHODS**

### 155 **Bacterial strains, genomes and origin**

156 Publicly available genome sequences from 1574 human isolates from Kenya, USA, Canada  
157 and the Netherlands, together with 111 genomes from animal isolates were analysed (Seale *et*  
158 *al.*, 2015; Flores *et al.*, 2015; Teatero *et al.*, 2014; Jamrozy *et al.*, 2018; Table 1). The  
159 genome assemblies were not available for the isolates from Kenya and the Netherlands. In  
160 those cases, short read sequence data were retrieved from the European Nucleotide Archive  
161 (ENA, <https://www.ebi.ac.uk/ena>). Raw DNA reads were trimmed of low-quality ends and  
162 cleaned of adapters using Trimmomatic software (ver. 0.32; Bolger *et al.*, 2014) and a sample  
163 of 1400000 reads for each paired-end library (e.g. 700000 reads x 2) was used for de-novo  
164 assembly. De-novo assembly was performed with SPAdes software (ver 3.8.0, Bankevich *et*  
165 *al.*, 2012), using k-mer values of 21, 33, 55 and 77, automatic coverage cutoff, and removal  
166 of contigs 200 bp-long or shorter. De-novo assemblies were checked for plausible length  
167 (between 1900000 and 2200000 bp), annotated using Prokka (ver. 1.12; Seemann, 2014) and  
168 checked for low-level contamination using Kraken software (ver. 0.10.5; Wood and Salzberg,  
169 2014). In cases for which more than 5% of the contigs belonged to a species different from  
170 *Streptococcus agalactiae*, the genome sequence was flagged as contaminated and not  
171 included in any further analysis. Resulting assemblies were deposited in the  
172 [pubmlst.org/sagalactiae](http://pubmlst.org/sagalactiae) database which runs the BIGSdb genomics platform (Jolley and  
173 Maiden, 2006).

174

175 In addition, 303 carriage and invasive disease strains isolated in Malawi between 2004 and  
176 2016 in the context of carriage and invasive disease surveillance were sequenced. For these,  
177 DNA was extracted from an overnight culture using DNAeasy blood & tissue kit (Qiagen®)  
178 following manufacturer's guidelines for bacterial DNA, and sequenced using HiSeq4000  
179 (paired-end library 2x150) platform at Oxford Genomics Centre UK. Sequences were then  
180 assembled as described above.

181

182

|                        | Country         |                      | Count | # Invasive | # Missing data |
|------------------------|-----------------|----------------------|-------|------------|----------------|
| <b>Human isolates</b>  | Malawi          | This work*           | 303   | 131        | 6              |
|                        | Kenya           | Seale et al., 2015   | 1034  | 71         | 0              |
|                        | USA             | Flores et al., 2015  | 99    | 99         | 0              |
|                        | Canada          | Teatero et al., 2014 | 141   | 141        | 0              |
|                        | The Netherlands | PRJEB14124**         | 300   | unknown    | 300            |
| <b>Animal isolates</b> | Italy           | ***                  | 3     |            |                |
|                        | Kenya           | ***                  | 2     |            |                |
|                        | Germany         | ***                  | 1     |            |                |
|                        | Brazil          | ***                  | 1     |            |                |
|                        | Unknown         | ***                  | 104   |            |                |

183

184 **Table 1 – Characteristics of GBS isolates.** Animal isolates are reported to be isolated from cattle (n=83), fish  
 185 (n=24) and frogs (n=3). \* Isolated from Queen Elizabeth Central Hospital, Blantyre; \*\* Jamrozy, *et al.*, 2018;  
 186 \*\*\* genomes retrieved from pubmlst.org. Full metadata are reported in Supplementary table S1.

187

### 188 **MLST and Serotype definition**

189 Serotypes were determined via DNA sequence similarity, as described previously [Seale, *et*  
 190 *al.* 2016]. BLASTn was used to align the DNA fragments typical of each serotype to the  
 191 DNA assemblies of the isolates with the following parameters: evaluate 1e-10, minimum 95  
 192 percent identity, minimum 90% query coverage, and the results for each BLASTn alignment  
 193 was parsed with ad-hoc perl scripts. Accession numbers for the sequences used were  
 194 AB028896.2 (from 6982 to 11695, serotype Ia); AB050723.1 (from 2264 to 6880, serotype  
 195 Ib); EF990365.1 (from 1915 to 8221, serotype II); AF163833.1 (from 6592 to 11193,  
 196 serotype III); AF355776.1 (from 6417 to 11656, serotype IV); AF349539.1 (from 6400 to  
 197 12547, serotype V); AF337958.1 (from 6437 to 10913, serotype VI); AY376403.1 (from  
 198 3403 to 8666, serotype VII); AY375363.1 (from 2971 to 7340, serotype VIII). Only one  
 199 fragment matched each genome under these parameters, and it defined each isolate's  
 200 serotype. If none of the serotype defining DNA fragments matched under the described  
 201 parameters, the isolate was defined as Non-Typeable (NT).

202

203 Multi-locus sequence types (MLST) STs were derived from the allelic profiles of the 7  
 204 housekeeping genes (*adhP*, *pheS*, *atr*, *glnA*, *sdhA*, *glcK tkt*). This grouped strains into 91  
 205 unique STs. Strains which did not show a full set of housekeeping gene alleles or were not  
 206 assigned to any previously described ST (n=68) were double-checked for sequence  
 207 contamination and assigned to a non-sequence typeable (NST) group.

208

## 209 **Phylogeny inference**

210 BURST [Enright *et al.*, 2002] was used to evaluate the relatedness between different STs, and  
211 to define CCs. Five random subsets, each containing 1000/1988 isolates, were analysed using  
212 eBURST on PubMLST [Jolley and Maiden, 2006]. This grouped STs sharing at least five out  
213 of seven MLST loci, and identified the central ST (i.e. the ST with the highest number of  
214 single or double locus variants), and was used to define CCs. Each of the five subsets showed  
215 the same six CCs (CC1, CC6, CC10, CC19, CC17 and CC23) plus a series of singletons (STs  
216 not belonging to any CC). CCs were defined as the set of STs associated with a particular CC  
217 in at least one run of eBURST.

218

219 Core-genome phylogeny of GBS datasets was inferred using the software Parsnp (from  
220 Harvest package, ver. 1.1.2; Treangen *et al.*, 2014), which performs a core genome SNP  
221 typing and uses Fasttree2 [Price *et al.*, 2010] to reconstruct whole-genome maximum-  
222 likelihood phylogeny, under a generalised time-reversible model. Each tree shown was rooted  
223 at mid-point. Parsnp requires a reference to calculate the core SNPs shared by all isolates:  
224 complete finished reference genomes from 5 different strains were used separately (accession  
225 numbers: NC\_021485 – strain 09mas018883 – CC1; NC\_007432 – strain A909 – CC6;  
226 HG939456 – strain COH1 – CC17; NC\_018646 - strain GD201008 – CC6; NC\_004368 –  
227 strain NEM316 – CC23). Visualisation of the phylogenetic analysis was performed via iTol  
228 (Letunic and Bork, 2016)

229

## 230 **Pangenome construction and genome wide association analysis**

231 A pangenome was generated from the combined African (isolates from Malawi and Kenya,  
232 Seale *et al.*, 2016), Canadian [Teatero *et al.*, 2014], American [Flores *et al.*, 2015], Dutch and  
233 animal-derived strains using Roary, (ver. 3.8.0; Page *et al.*, 2015). Parameters for each run  
234 were: 95% of minimum blastp identity; MLC inflation value 1.5; with 99% as the percentage  
235 cutoff in which a gene must be present to be considered as core.

236

237 In the last decade, several pipelines have been developed for bacterial genome wide  
238 association studies (GWAS), such as PLINK, PhyC, ROADTRIPS and SEER [Chen and  
239 Shapiro, 2015; Chang *et al.*, 2015; Thornton *et al.*, 2010; Lees *et al.*, 2016]. Scoary  
240 [Brynildsrud *et al.*, 2016] was designed to highlight genes in the accessory pangenome of a  
241 bacterial dataset associated with a particular bacterial phenotype: it can deal with either  
242 binary/discrete phenotypes (+/- e.g. bacterial colony colour) or continuous phenotypes (e.g.

243 antimicrobial resistance). In this analysis, Scoary (ver. 1.6.16) was used to establish which  
244 genes were typical of each CC via a Pangenome-Wide Association Study (pan-GWAS). The  
245 CC of each isolate was depicted as a discrete phenotype, e.g. belonging to CC17 or not, and  
246 defined as “positive” or “negative” respectively with the Scoary algorithm evaluating which  
247 gene feature is statistically associated with a particular CC [Brynildsrud *et al.*, 2016]. The  
248 cut-off for a significant association was a *p*-value lower than 1e-10 and a sensitivity and  
249 specificity greater than 90 percent. Genes associated with CC1, CC10, CC19, CC17 or CC23  
250 were plotted on the circular representation of the chromosome of 5 GBS isolates belonging to  
251 each CC (strains ST-1; NCTC8187; 2603V/R; SGM4; 874391; NGBS572). The plot was  
252 obtained with BRIG (ver. 0.8; Alikhan *et al.*, 2011). Gene synteny was then evaluated for  
253 those genes found to be associated with each CC. To do this, three genomes belonging to  
254 each CC were selected, aligned using ProgressiveMauve and the genes identified from the  
255 pan-GWAS analysis plotted [Darling *et al.*, 2010]. Mauve (ver. 2.3.1; Darling *et al.*, 2004)  
256 was used to produce a graphical representation of the alignment and gene synteny was  
257 qualitatively evaluated.

258

259 Sequence diversity of genes identified from the pan-GWAS analysis was investigated by  
260 selecting one representative nucleotide gene sequence associated with each CC (sequences  
261 reported in supplementary information file 1) and aligning this against each genome included  
262 in the analysis using BLASTn version 2.3. The bitscore value of each gene, aligned against  
263 each isolate, was used to produce the heatmap shown in Supplementary figure S2, using the  
264 R package pheatmap (ver. 1.0.10; <https://CRAN.R-project.org/package=pheatmap>). Bitscores  
265 were normalised against (i.e. divided by) the highest scoring isolate for each gene: the  
266 normalised bitscore was  $0 < x < = 1$  where 1 corresponds to the highest identified bitscore, 0  
267 corresponds to the absence of the gene, and values in between highlight a different level of  
268 gene similarity. For the identification of alleles that distinguish strains isolated from disease  
269 from carriage, we calculated the allelic profiles of the genes identified by the pan-GWAS  
270 pipeline in the 547 CC 17 strains (for which the source of isolation was non-animal and  
271 known). For each gene we selected the alleles present in at least 10 strains, and calculated the  
272 proportion of strains isolated from invasive source and carriage. Significance for alleles  
273 unevenly distributed between carriage and disease was calculated with Fisher test.

274

275 **Ethical approval for Malawi GBS Collection**



276 Collection of carriage isolates was approved by College of Medicine Research Ethics  
277 Committee (COMREC), University of Malawi (P.05/14/1574) and the Liverpool School of  
278 Tropical Medicine Research Ethics Committee (14.036). Invasive disease surveillance in was  
279 approved by COMREC (P.11/09/835 and P.08/14/1614).

280

281

## 282 **RESULTS**

### 283 **GBS whole genome sequencing dataset**

284 A total of 358 Malawian GBS genome sequences were initially available. Of these, 55  
285 samples did not pass the quality checks, therefore the final Malawian dataset was composed  
286 of 303 GBS strains (Table 1), including 131 isolated from invasive disease in children and  
287 166 isolated from healthy mothers, in which draft genome assemblies had an average N50 of  
288 163462 (range 12593 – 717849), average contigs number of 70 (range 20 – 377) and average  
289 longest contig of 30148 (range 44691 – 1019176).

290

291 Five further datasets were included (1674 clinical isolates) composed of 1034 Kenyan strains  
292 Kenya, 99 American, 141 Canadian, and 300 Dutch strains randomly selected from 1512  
293 isolates from the Netherlands (Table 1). A total of 111 animal isolates sampled in several  
294 different countries was also included (Table 1). Where information was available, 446  
295 (22.4% of the 1988 total) strains were associated with invasive disease (bacteraemia or  
296 meningitis) and 1125 (56.6%) from healthy carriers. Meta-data consisting of country of  
297 origin, year of isolation, capsular serotype, MLST-ST and accession number are reported in  
298 Table S1. The genome sequences from 1998 isolates were used for the analysis.

299

### 300 **Clonal-complex assignment and core genome phylogeny**

301 Six CCs were identified: CC1, CC6, CC10, CC19, CC17 and CC23 according to the groups  
302 defined using the BURST algorithm [Enright *et al.*, 2002] and core genome phylogeny (Table  
303 S1 and S2). Several STs were found in just one country (e.g. ST 866 found exclusively in  
304 Malawi or ST 196 in Kenya); however, these STs were always represented by less than 20  
305 isolates. With the exception of the USA, where isolates were intentionally selected to  
306 represent only CC1 [Teatero *et al.*, 2014], and the rare CC6 represented by 22 isolates, CCs  
307 were distributed across all of the countries analysed.

308

309 While each serotype in the clinically derived WGS was predominantly associated with only  
310 one or two CCs, the animal isolates were more variable (Figure 1). SNPs identified in the part  
311 of the genome shared by all isolates (~26000 polymorphisms) were used to infer the ML  
312 phylogenetic trees (Figure 2). CCs clustered in distinct branches of the tree; in particular,  
313 CC17 and CC23 produced two clusters. Although the majority of animal derived WGS data  
314 clustered within a separate branch, 59/111 isolates were located in clusters that were  
315 associated with human derived samples and CCs. For example, three animal isolates  
316 (LMG15085, LMG15094 and CI7628) clustered with the clinical isolates in the CC17. This  
317 pattern raises the possibility that the human-associated CCs analysed here arose in animals  
318 and then underwent zoonotic transfer and clonal expansion after infection of the human host.  
319

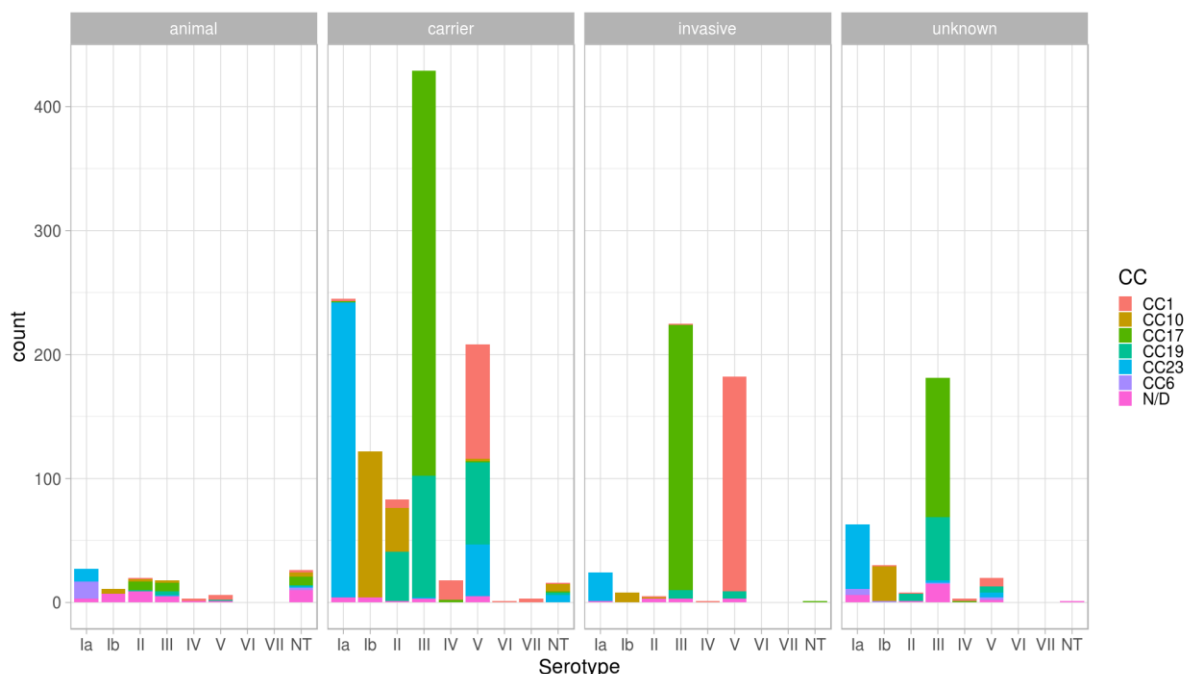

320  
321 **Figure 1 – Isolates used in this study, stratified per serotype, CC and source.** Clinical isolates are grouped  
322 as “invasive” (including strains isolated from children and adults affected by any GBS invasive disease),  
323 “carrier” (including healthy carrying mothers), and “unknown” where metadata were not available.

324

### 325 **Pangenome and pan-GWAS**

326 Scoary has previously been used for a similar pan-GWAS analysis of 3 CC17 strains  
327 [Almeida *et al.*, 2017]. In this study, we applied it to a pangenome built on a dataset of 1988  
328 strains, representing 6 different clonal complexes (Figure 1): according to the roary  
329 nomenclature [Page *et al.*, 2015], 1374 genes were included in the core genome (i.e. present  
330 in more than 95% of the strains, “core” and “soft-core” genes), and 12457 genes in the  
331 accessory genome (i.e. less than 95% of the strains, “shell” and “cloud” genes). We observed  
332 that saturation of the pangenome was achieved. A total of 51, 41, 39, 102 and 64 genes

333 associated with CC1, CC10, CC19, CC17 and CC23 respectively (Table 2; Table S3) were  
334 identified, with a specificity and sensitivity in defining the CC given the annotated CDS and  
335 vice-versa greater than 90% ( $p < 0.05$ ). The pipeline was not applied to CC6, which was  
336 represented by only 22 genomes in our dataset. BLASTn was used to confirm whether gene  
337 sequences associated with each CC in the pan-GWAS were completely absent in different  
338 CCs, or had accumulated sufficient mutations to fail recognition by automated annotation  
339 (i.e. PROKKA). We identified 57 such genes in CC17 out of the 102 identified by the Scoary  
340 pipeline, 22 genes in CC23, 4 genes in CC1, 9 genes in CC10 and 5 in CC19 (Figure S2;  
341 Table S3). This suggests that the genes characterising a particular CC may have been  
342 rendered non-functional (i.e. as pseudogenes) in other CCs (Table S3 highlights which CC-  
343 associated genes are completely absent, and which genes are characterised by mutations -  
344 SNPs or In-dels - that alter the protein sequence with point mutations or truncation).

345

346 Gene location identified from the pan-GWAS analyses in CC1, CC10, CC17 and CC23 was  
347 evenly spread across the chromosome, and not clustered in a particular area consistent with  
348 the gene associations observed not resulting from a chromosomally integrated plasmid or  
349 transposon pathogenicity island acquired through horizontal gene transfer (Figure 3). One  
350 exception was CC19, where the majority of the 39 genes were clustered in 200 kbp region of  
351 the chromosome. Gene synteny was conserved across different isolates (Gene synteny in  
352 CC17 isolates is shown in figure S3).

353

354 The majority of the pan-GWAS identified genes were associated with only one CC, but a  
355 particular cluster of genes associated with CC10 (including the *gatKTEM* system for  
356 galactose metabolism) was also present in a set of isolates belonging to CC19 (Figure 2).  
357 These isolates were all from Africa (Malawi and Kenya) and were ST-327 and ST-328.

358

359

360

361

362

363

364

365

366

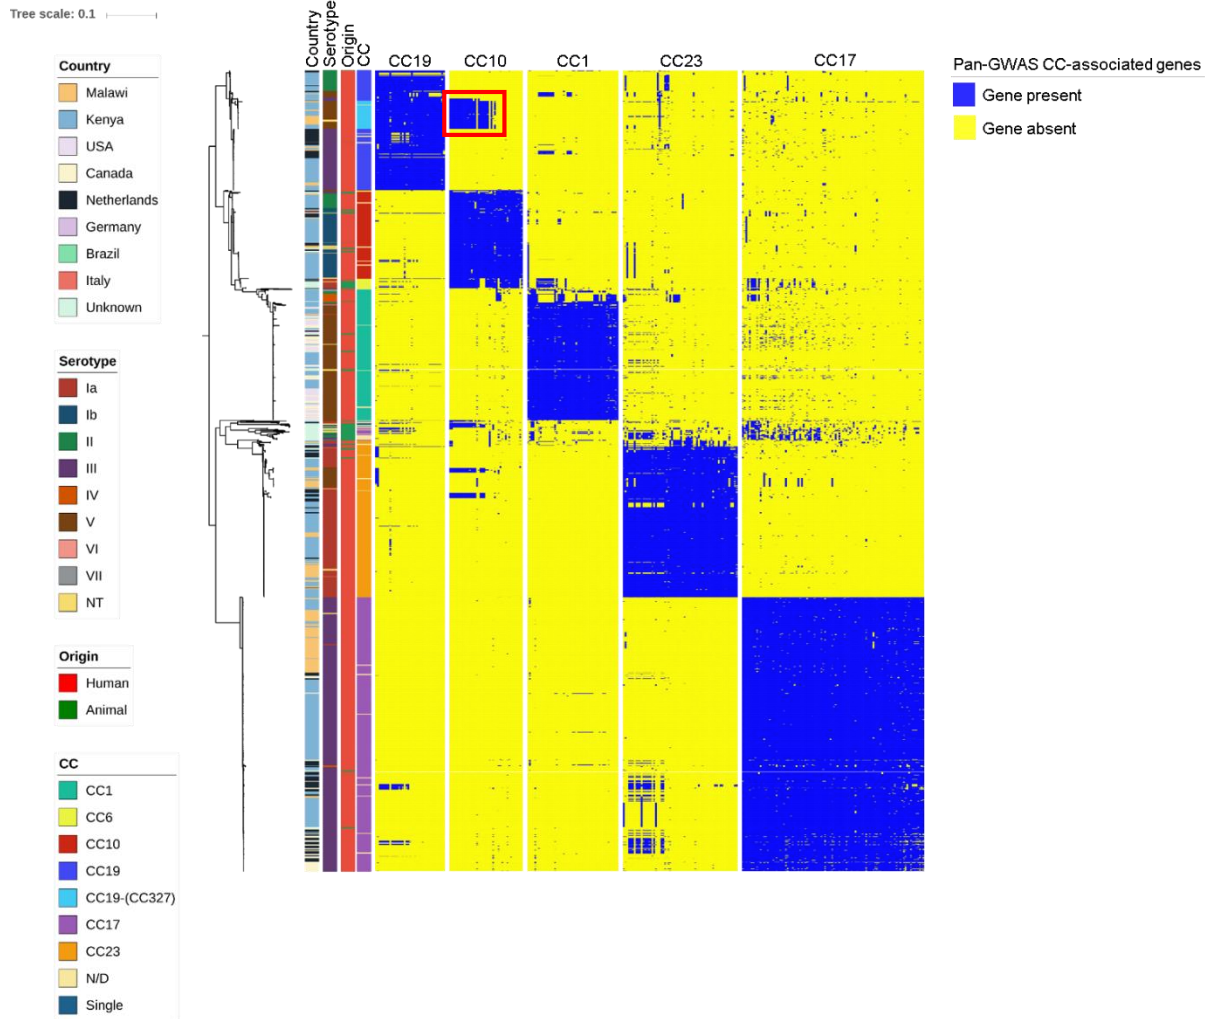

367  
368  
369  
370  
371  
372  
373  
374  
375

**Figure 2 – Core-genome based population structure of GBS.** The phylogenetic tree is annotated with 4 coloured strips representing the clonal complex, the country of isolation, the origin and the serotype of each strain. The three binary heatmaps, represent the presence (blue) or absence (yellow) of the genes identified by the pan-GWAS pipeline. Tree is rooted at midpoint. The reference strain used in this analysis was COH1 - reference HG939456. The red square in the “CC10” heatmap highlights the cluster of CC10-associated genes found in CC19 clones. Trees build with different reference strains are shown in figure S1, and show analogous topology.

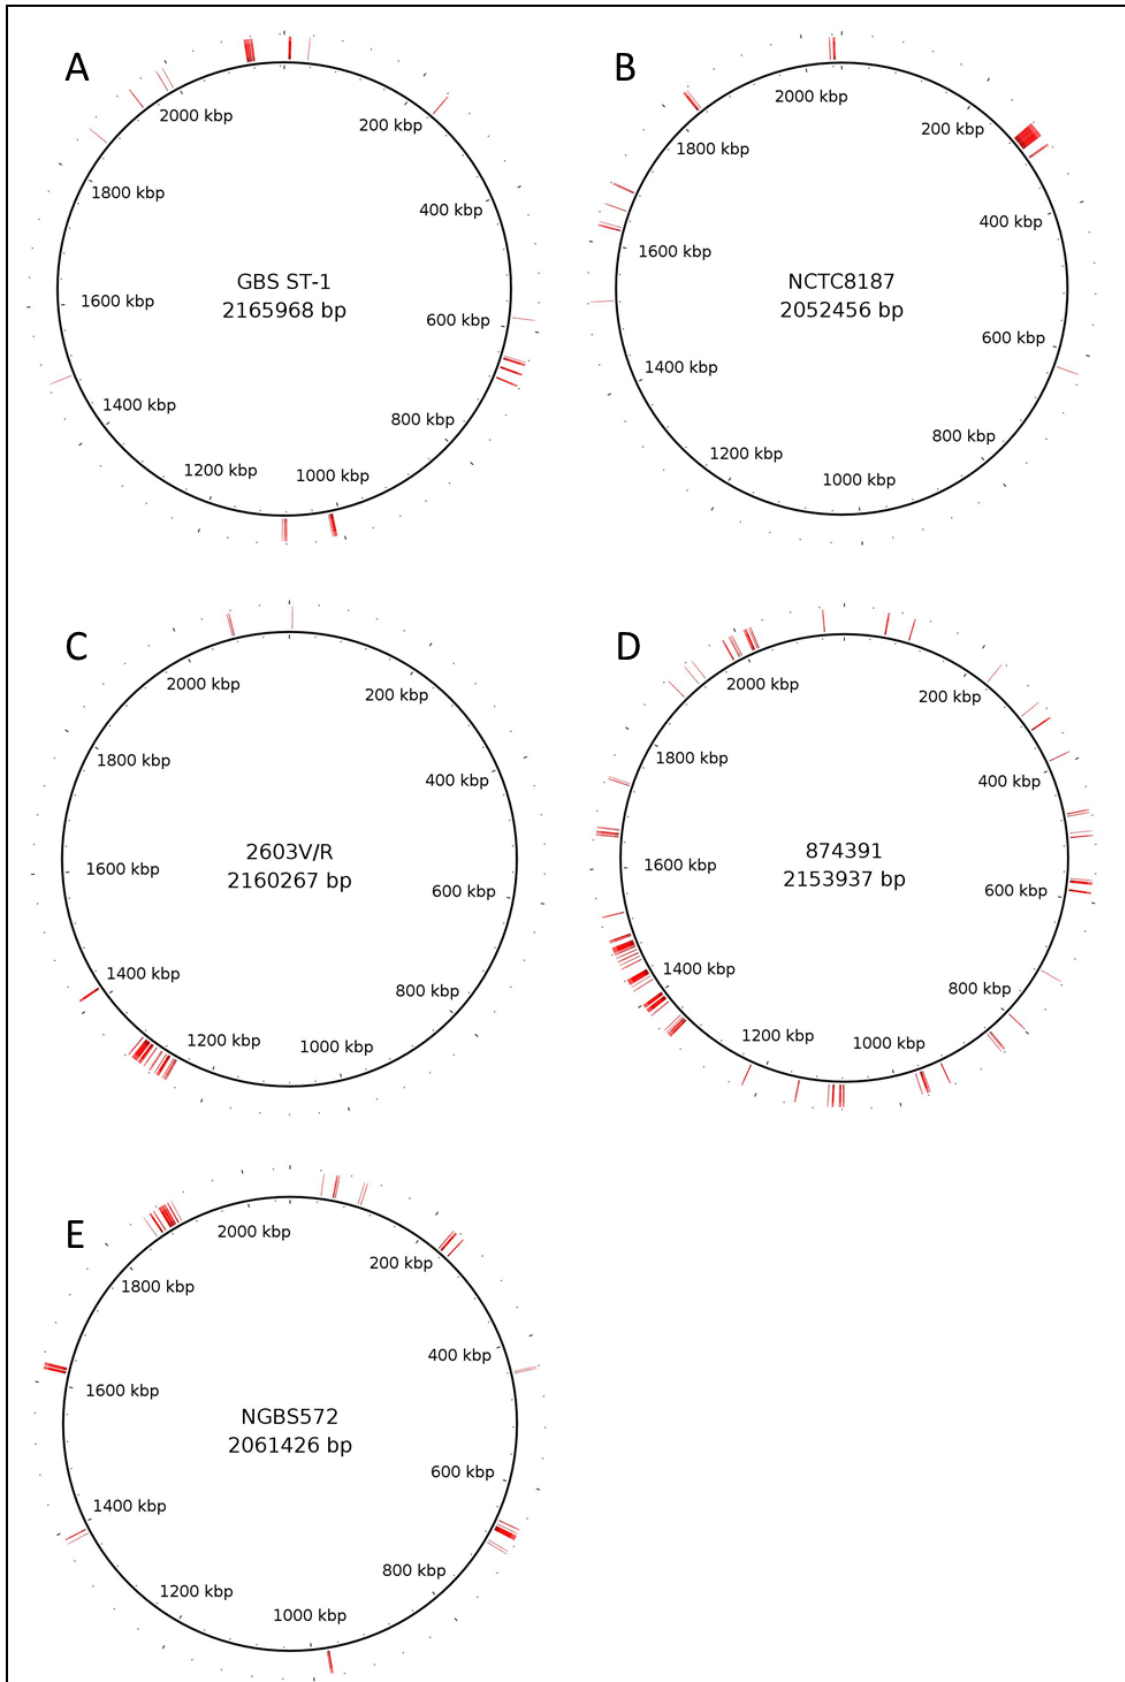

376  
377  
378  
379  
380

**Figure 3 – Location of genes identified by the pan-GWAS pipeline on a strain belonging to CC1 (A), CC10 (B), CC19 (C), CC17 (D) and CC23 (E). Gene location on each chromosome is represented by a red mark.**

### 381 **Functional pathways affected by CC-specific genes**

382 A total of 279 genes were found to be CC-specific (Table S3). Genes characteristic of CC17  
383 and CC23 were classified into five functional categories (Table 2): metabolism,  
384 environmental information processing, cellular processes, human disease, genetic information  
385 processing. In both CCs, the most represented functional families were those including  
386 metabolic genes and environmental information processes.

387

388 Differences in metabolic pathways between CC17 and CC23 included carbohydrate, amino  
389 acid, nitrogen compound and fatty acid metabolism. Siderophores for the uptake and  
390 transport of micronutrients (i.e. iron or nickel), and essential for successful colonisation of the  
391 human host in several bacterial pathogens [Bray *et al.*, 2009; Janulczyk, *et al.*, 2003; Kehl-  
392 Fie *et al.*, 2013], also exhibited significant variation, for instance with genes for nickel uptake  
393 (*nikE* and *nikD*) and iron transport (*feuC*) truncated or characterised by SNPs in non-CC17  
394 strains (Table S3).

395

396 CC17 and CC23 also showed differences in the genes affecting the environmental  
397 information processing functional pathways characterised by the presence of  
398 phosphotransferase (PTS) systems and two component systems (TCS), used for signal  
399 transduction and sensing of environmental stimuli. Moreover, in the same functional  
400 category, differences were present in secretion systems, transporters, quorum sensing and  
401 bacterial toxins. These pathways are used by GBS not only in colonisation of the host, but  
402 also to gain competitive advantage with other microorganisms occupying a particular  
403 ecological niche [Paterson *et al.*, 2006].

404

405 Genes for prokaryotic defence systems, such as the CRISPR-Cas9 system, were also found,  
406 as well as proteins involved in genetic information processing such as transcription factors  
407 and regulators that may affect the expression of multiple genes [Lier *et al.*, 2015]. Finally,  
408 antibiotic resistance also appears amongst the lineage specific characteristics; in particular,  
409 CC23 is the only CC showing typical genes involved in vancomycin resistance. CC17 also  
410 showed the presence of genes belonging to the KEGG group for “Nucleotide excision repair”  
411 and “DNA repair/recombination protein” (KO numbers 03420/03400, Table 2) which could  
412 indicate a variation in mutagenesis rate, thus capacity to respond to changes in environmental  
413 conditions and presence of stresses.

414

415 In contrast, the genes defining CC1, 10 and 19 were confined to metabolism, environmental  
416 information processing and genetic information processing. Genes involved with regulation  
417 and environmental sensing (PTS systems), as well as secretion systems were identified in this  
418 group of CCs. In particular, a gene encoding for the VirD4 type IV secretion system protein  
419 was associated with CC19. CC10 was characterised by an array of genes involved in  
420 carbohydrate metabolism and uptake, such as the ABC transport system for multiple sugar  
421 transport.

422

423 The majority of genes characteristic for CC1 were of unknown function, with the exception  
424 of genes involved with genetic regulation and a complete toxin/antitoxin system *phd/doc*  
425 [Chan *et al.*, 2014]. These systems are often described as a tool for stabilising  
426 extrachromosomal DNA (i.e. plasmids), but they are often found integrated chromosomally  
427 in both Gram positive and Gram negative bacterial species, and their function when in this  
428 setting is unclear [Van Melderen, 2010].

429

430 In relation to the CC17-associated genes, we also checked for allelic variants specific to  
431 strains isolated from invasive disease or carriage. Figure S4 shows the proportion of CC17  
432 invasive or carriage strains, and the frequency of each allelic variant. We identified 21 genes  
433 with alleles that statistically differentiated strains isolated from carriage and invasive disease  
434 (Fisher test,  $p < 0.05$ , Table 3). The DNA sequence of the allelic variant differed by a single  
435 polymorphism in all cases. In 15/21 cases this nucleotide change was translated into an  
436 amino acid change (missense mutation), while in only a single case the mutation was  
437 nonsense, resulting in the truncated protein. This was the case of *gcc1730*, encoding for a  
438 hypothetical protein with no putative conserved domains identified. These genes have the  
439 potential to affect the metabolism and the virulence of the bacterial strains. For example,  
440 although the major pilin synthesis gene is known to be characterised by locus variants which  
441 are associated with biofilm and virulence (namely variants PI-I, PI-IIa and PI-IIb, [Périchon  
442 *et al.*, 2017]), CC17 is characterised by the presence of PI-I/PI-IIb. Smaller variations within  
443 the locus PI-IIb appear to be associated with CC17 isolated from carriage, suggesting that this  
444 gene may be impaired in functionality. Similarly, the *prtP* gene and the *glgD* genes, encoding  
445 respectively for a protease associated with virulence and for the ATP-binding cassette of a  
446 multidrug-efflux pump, have alleles that are more common in strains isolated from disease,  
447 highlighting the potential for these allelic variations to result in a more virulent phenotype  
448 [Obolski *et al.*, 2019].

449

450

| <b>CC1</b>                                          | <b>Kegg #</b> | <b>Pathway</b>                                             |
|-----------------------------------------------------|---------------|------------------------------------------------------------|
| <b>Metabolism (09100)</b>                           | 01130         | Biosynthesis of antibiotics                                |
|                                                     | 00052         | Galactose metabolism                                       |
|                                                     | 00999         | Biosynthesis of secondary metabolites - unclassified       |
| <b>Environmental Information Processing (09130)</b> | 02060         | Phosphotransferase system (PTS)                            |
| <b>CC10</b>                                         |               |                                                            |
| <b>Metabolism (09100)</b>                           | 01100         | Metabolic pathways                                         |
|                                                     | 01110         | Biosynthesis of secondary metabolites                      |
|                                                     | 01120         | Microbial metabolism in diverse environments               |
|                                                     | 01130         | Biosynthesis of antibiotics                                |
|                                                     | 00010         | Glycolysis / Gluconeogenesis                               |
|                                                     | 00040         | Pentose and glucuronate interconversions                   |
|                                                     | 00051         | Fructose and mannose metabolism                            |
|                                                     | 00052         | Galactose metabolism                                       |
|                                                     | 00561         | Glycerolipid metabolism                                    |
|                                                     | 00600         | Sphingolipid metabolism                                    |
|                                                     | 00603         | Glycosphingolipid biosynthesis - globo and isoglobo series |
| <b>Environmental Information Processing (09130)</b> | 02060         | Phosphotransferase system (PTS)                            |
| <b>CC19</b>                                         |               |                                                            |
| <b>Metabolism (09100)</b>                           | 01100         | Metabolic pathways                                         |
|                                                     | 00270         | Cysteine and methionine metabolism                         |
|                                                     | 00760         | Nicotinate and nicotinamide metabolism                     |
| <b>Environmental Information Processing (09130)</b> | 03070         | Bacterial secretion system                                 |
| <b>CC17</b>                                         |               |                                                            |
| <b>Metabolism (09100)</b>                           | 00010         | Glycolysis / Gluconeogenesis                               |
|                                                     | 00020         | Citrate cycle (TCA cycle)                                  |
|                                                     | 00052         | Galactose metabolism                                       |
|                                                     | 00500         | Starch and sucrose metabolism                              |
|                                                     | 00520         | Amino sugar and nucleotide sugar metabolism                |
|                                                     | 00620         | Pyruvate metabolism                                        |
|                                                     | 00630         | Glyoxylate and dicarboxylate metabolism                    |
|                                                     | 00640         | Propanoate metabolism                                      |
|                                                     | 00680         | Methane metabolism                                         |
|                                                     | 00910         | Nitrogen metabolism                                        |
|                                                     | 00561         | Glycerolipid metabolism                                    |
|                                                     | 00230         | Purine metabolism                                          |
|                                                     | 00240         | Pyrimidine metabolism                                      |
|                                                     | 00250         | Alanine, aspartate and glutamate metabolism                |
|                                                     | 00260         | Glycine, serine and threonine metabolism                   |
|                                                     | 00280         | Valine, leucine and isoleucine degradation                 |
|                                                     | 00220         | Arginine biosynthesis                                      |
|                                                     | 01007         | Amino acid related enzymes                                 |
|                                                     | 00430         | Taurine and hypotaurine metabolism                         |
|                                                     | 01003         | Glycosyltransferases                                       |
|                                                     | 01005         | Lipopolysaccharide biosynthesis proteins                   |
|                                                     | 01011         | Peptidoglycan biosynthesis and degradation proteins        |
|                                                     | 00760         | Nicotinate and nicotinamide metabolism                     |
|                                                     | 00770         | Pantothenate and CoA biosynthesis                          |
|                                                     | 01001         | Protein kinases                                            |
|                                                     | 01002         | Peptidases                                                 |



|                                                     |       |                                                          |
|-----------------------------------------------------|-------|----------------------------------------------------------|
|                                                     | 03021 | Transcription machinery                                  |
|                                                     | 03016 | Transfer RNA biogenesis                                  |
| <b>CC17 (continue)</b>                              |       |                                                          |
|                                                     | 00970 | Aminoacyl-tRNA biosynthesis                              |
|                                                     | 03110 | Chaperones and folding catalysts                         |
|                                                     | 03060 | Protein export                                           |
|                                                     | 03420 | Nucleotide excision repair                               |
|                                                     | 03400 | DNA repair and recombination proteins                    |
| <b>Environmental Information Processing (09130)</b> | 02000 | Transporters                                             |
|                                                     | 02010 | ABC transporters                                         |
|                                                     | 02060 | Phosphotransferase system (PTS)                          |
|                                                     | 03070 | Bacterial secretion system                               |
|                                                     | 02020 | Two-component system                                     |
|                                                     | 02044 | Secretion system                                         |
|                                                     | 02022 | Two-component system                                     |
| <b>Cellular Processes (09140)</b>                   | 04147 | Exosome                                                  |
|                                                     | 02048 | Prokaryotic Defense System                               |
|                                                     | 02024 | Quorum sensing                                           |
|                                                     | 02026 | Biofilm formation - Escherichia coli                     |
| <b>Unclassified (09190)</b>                         | 99982 | Energy metabolism                                        |
|                                                     | 99984 | Nucleotide metabolism                                    |
|                                                     | 99999 | Others                                                   |
|                                                     | 99977 | Transport                                                |
| <b>CC23</b>                                         |       |                                                          |
| <b>Metabolism (09100)</b>                           | 00630 | Glyoxylate and dicarboxylate metabolism                  |
|                                                     | 00061 | Fatty acid biosynthesis                                  |
|                                                     | 01040 | Biosynthesis of unsaturated fatty acids                  |
|                                                     | 01004 | Lipid biosynthesis proteins                              |
|                                                     | 00260 | Glycine, serine and threonine metabolism                 |
|                                                     | 00550 | Peptidoglycan biosynthesis                               |
|                                                     | 01011 | Peptidoglycan biosynthesis and degradation proteins      |
|                                                     | 00780 | Biotin metabolism                                        |
|                                                     | 00670 | One carbon pool by folate                                |
|                                                     | 01008 | Polyketide biosynthesis proteins                         |
|                                                     | 01053 | Biosynthesis of siderophore group nonribosomal peptides  |
|                                                     | 00333 | Prodigiosin biosyntheses                                 |
|                                                     | 01002 | Peptidases                                               |
| <b>Cellular Processes (09140)</b>                   | 02000 | Transporters                                             |
|                                                     | 02010 | ABC transporters                                         |
|                                                     | 02020 | Two-component system                                     |
|                                                     | 02042 | Bacterial toxins                                         |
| <b>Human Disease (09100)</b>                        | 02048 | Prokaryotic Defense System                               |
|                                                     | 02024 | Quorum sensing                                           |
|                                                     | 01502 | Vancomycin resistance                                    |
|                                                     | 01504 | Antimicrobial resistance genes                           |
| <b>Unclassified (09190)</b>                         | 99988 | Biosynthesis and biodegradation of secondary metabolites |
| <b>Genetic Information Processing (09120)</b>       | 03000 | Transcription factors                                    |

451

452 **Table 2 – Pathways and functional categories identified by KEGG annotation in the five groups of CC-**  
 453 **associated genes.** For each clonal complex the functional category pathway is shown on the right-end side of  
 454 the table. For each functional category, the metabolic pathway affected and its Kegg reference number are  
 455 reported.

456

| Gene           | Allele 1 |            | Allele 2 |            | Mismatches (aa) | % difference (aa) |
|----------------|----------|------------|----------|------------|-----------------|-------------------|
|                | p-value  | Odds-ratio | p-value  | Odds-ratio |                 |                   |
| <i>gdh</i>     | 1.16E-18 | 84.47      | 1.67E-03 | 0.19       | 0               | 0                 |
| <i>dinG</i>    | 1.95E-10 | 0.08       | 0.063    | 0.55       | 0               | 0                 |
| <i>gcc178</i>  | 3.83E-21 | 0.09       | 0.151    | 1.41       | 0               | 0                 |
| <i>metN</i>    | 6.07E-19 | 0.10       | 2.97E-14 | 0.10       | 1               | 0.4               |
| <i>yhjX</i>    | 0.021    | 0.24       |          |            | 1               | 0.2               |
| <i>pta</i>     | 0.013    | 0.19       |          |            | 1               | 0.3               |
| <i>strA</i>    | 0.004    | 5.86       |          |            | 0               | 0                 |
| <i>gcc1730</i> | 3.73E-03 | 5.93       |          |            | 1*              | 0.3*              |
| <i>gpp1725</i> | 6.43E-05 | 0.47       |          |            | 1               | 0.6               |
| <i>endA</i>    | 4.07E-05 | 0.46       |          |            | 1               | 0.9               |
| <i>dtpT</i>    | 1.25E-05 | 0.43       |          |            | 1               | 0.2               |
| <i>cadR</i>    | 7.15E-06 | 0.42       |          |            | 1               | 0.3               |
| <i>pyrB</i>    | 1.71E-08 | 0.10       |          |            | 1               | 0.3               |
| <i>gcc171</i>  | 1.37E-09 | 0.15       |          |            | 1               | 1.1               |
| <i>gcc176</i>  | 2.18E-10 | 3.56       |          |            | 1               | 0.2               |
| <i>gcc1713</i> | 1.87E-10 | 3.55       |          |            | 0               | 0                 |
| <i>natA</i>    | 3.02E-11 | 3.69       |          |            | 1               | 0.9               |
| <i>inIA_2</i>  | 5.46E-16 | 0.09       |          |            | 1               | 0.1               |
| <i>prtP_2</i>  | 3.31E-17 | 42.87      |          |            | 1               | 0.1               |
| <i>glgD</i>    | 2.88E-18 | 83.77      |          |            | 1               | 0.9               |
| <i>efrB</i>    | 1.15E-19 | 49.48      |          |            | 1               | 0.2               |

457

458 **Table 3 – CC17-associated genes showing at least one allele statistically associated with either strains**  
 459 **isolated from invasive disease or from carriage.** \* = *gcc1730* shows only one mismatch in the protein  
 460 alignment, which introduced a stop codon in position 122.  
 461

## 462 **DISCUSSION**

463 *S. agalactiae* isolated from human and animal sources is characterised by a range of Clonal  
464 Complexes and Sequence Types. Each CC appears to be phenotypically different, with CC1  
465 being commonly isolated in adult disease, and CC17 (associated with capsular serotype III)  
466 commonly isolated in neonatal disease and demonstrating hypervirulence [Teatero *et al.*,  
467 2017; Shabayek and Spellerberg., 2018]. We show that these different CCs are characterised  
468 by different gene sets belonging to functional families involved in niche adaptation and  
469 virulence. Furthermore, within CC17, we have identified several, functionally important allelic  
470 variants associated with either carriage or disease. We suggest that each human-associated  
471 CC has maintained these genes following zoonotic transfer [Botelho, *et al.*, 2018]. This is in  
472 part reflected in the varying potential of different CCs to cause invasive diseases in different  
473 human hosts, as illustrated by the hypervirulence of CC17 in neonates, the lower neonatal  
474 invasive potential of CC1, CC19 and CC23 clones, and the propensity of CC1 to cause  
475 disease in adults with co-morbidities [Manning *et al.*, 2008; Teatero *et al.*, 2017].  
476 Importantly, these CC-specific genetic characteristics and the pattern of gene presence and  
477 absence are independent of geographical origin, with the exception the CC10 gene cluster  
478 present in the strains isolated from Africa belonging to ST327 and 328.

479  
480 Amongst the hypervirulent CC17-specific genes, there were several examples of previously  
481 identified genes associated with human disease due to GBS and other related bacteria. For  
482 instance, the transporter Nik which controls the uptake of nickel is essential for survival in  
483 the human host. A homologue of Nik has been shown to be essential for *Staphylococcus*  
484 *aureus* in the causation of UTIs [Remy *et al.*, 2013]. The DLD gene, encoding for  
485 dihydrolipoamide dehydrogenase enzyme [Smith *et al.*, 2002], has been implicated in several  
486 virulence related processes in *Streptococcus pneumoniae*, such as survival within the host and  
487 production of capsular polysaccharide. Mutants lacking the DLD gene are unable to cause  
488 sepsis and pneumonia in mouse models [Smith *et al.*, 2002]. Surface proteases in *S.*  
489 *agalactiae* are described to have several virulence-associated functions, such as inactivation  
490 of chemokines that recruit immune cells at the site of infection or facilitate invasion of  
491 damaged tissue [Lindahl *et al.*, 2005; Lalioui *et al.*, 2005]. We have identified PrtP and ScpA  
492 proteases, both characterised by the presence of C5a peptidase domains and a signal  
493 peptidase SpsB, specific to this complex. Genes known to be associated with CC17  
494 hypervirulence have also been identified in this analysis including the Pi-IIb locus [Périchon  
495 *et al.*, 2017], part of which is represented by the CC17-associated genes *gcc1732*, *lepB*,

496 *inlA\_2*, *gcc1733* (Table S3), supporting the validity of this analysis. Allelic variation of  
497 virulence associated genes has previously been used to identify genes classifying invasive  
498 and non-invasive strains in other streptococcal species [Obolski *et al.*, 2019]. A proportion of  
499 CC17 specific genes also showed unique alleles associated with invasive disease or carriage  
500 strains. Sixteen of 21 allelic variants resulted in a difference that was translated into the  
501 protein sequence, including regulatory proteins and virulence- or metabolism-associated  
502 proteins, such as ABC-transport systems, a major pilin protein and a C5a peptidase. These  
503 data suggest that there have been further selection processes within hypervirulent CC17 that  
504 could result in strains characterised by different virulence levels.

505

506 The CC23-specific genes identified are putatively involved in virulence and host invasion,  
507 including *mntH* a gene encoding for a manganese transport protein. During a bacterial  
508 infection the host limits access to manganese, amongst other micronutrients, and it has been  
509 shown that *S. aureus* responds to this host-induced starvation by expressing metal  
510 transporters, such as MntH [Kehl-Fie *et al.*, 2013]. Interestingly, CC23 is also associated with  
511 *vanY*, a gene implicated in vancomycin resistance in other streptococci [Romero-Hernández  
512 *et al.*, 2015]. GBS is typically susceptible to vancomycin [Berg *et al.*, 2014], an antibacterial  
513 glycopeptide obtained from *Streptomyces orientalis* which inhibits cell wall synthesis, alters  
514 the permeability of the cell membrane and selectively inhibits ribonucleic acid synthesis  
515 [Moellering, 2005]. Whether the presence of this gene also facilitates niche adaptation in the  
516 context of complex host-microbiota environment remains to be determined.

517

518 Lineage CC10, and the sub-lineage CC19 that includes the strains belonging to the ST327  
519 and ST328 are mostly characterised by metabolic genes, consistent with the lower virulence  
520 of these clonal complexes. The genes *galTKEM* are present in these two lineages only, and  
521 encode for the “Leloir pathway” in other streptococci, such as *mutans*, *thermophilus* and  
522 *pneumoniae* [Vaillancourt *et al.*, 2002; Abranches *et al.*, 2004; Anbukkarasi *et al.*, 2014].  
523 This pathway in *S. pneumoniae* is finely tuned by CbpA, and activated in tandem with the  
524 tagatose-6-phosphate pathway in order to maximise growth [Carvalho *et al.*, 2011]. The  
525 functionality of this pathway is yet to be described in GBS, but we hypothesise that accessing  
526 different methods to metabolise carbohydrates facilitates nutrient competition and survival.  
527 Amongst the non-metabolic genes that are associated with CC19, we identified a *virD4* gene,  
528 which is part of a previously identified type IV secretion system (T4SS) [Zhang *et al.*, 2012]

529 present in numerous bacterial species and associated with virulence effector translocation and  
530 conjugation [Alvarez-Martinez and Christie, 2009; Wallden *et al.*, 2010].

531

532 GBS is widely thought to be a zoonosis [Botelho *et al.*, 2018; Zadoks *et al.*, 2011; Lyhs *et al.*,  
533 2016; Manning *et al.*, 2010; Chen *et al.*, 2015]. Based on the CC-characterising genes that we  
534 identified, their relative frequency in the GBS population, and their distribution in the GBS  
535 genome, we hypothesise that *S. agalactiae* lineages that colonise humans initially evolved in  
536 animals and then subsequently expanded clonally in humans. In line with the observation that  
537 *S. agalactiae* has undergone genome reduction [Rosinski-Chupin *et al.*, 2013], we suggest  
538 that the human-adapted clones evolved in animals through loss of function of redundant  
539 genes. Having escaped the animal niche, they were then able evade the human immune  
540 system and establish successful colonisation (Figure 4). Recently, the “missing link” between  
541 animal and human adaptation of GBS was described to be CC103 [Botelho *et al.*, 2018].  
542 However, we have identified animal isolates belonging to human-associated CCs (e.g. CC17  
543 and CC23) which cluster together with human clinical isolates in the GBS population  
544 structure.

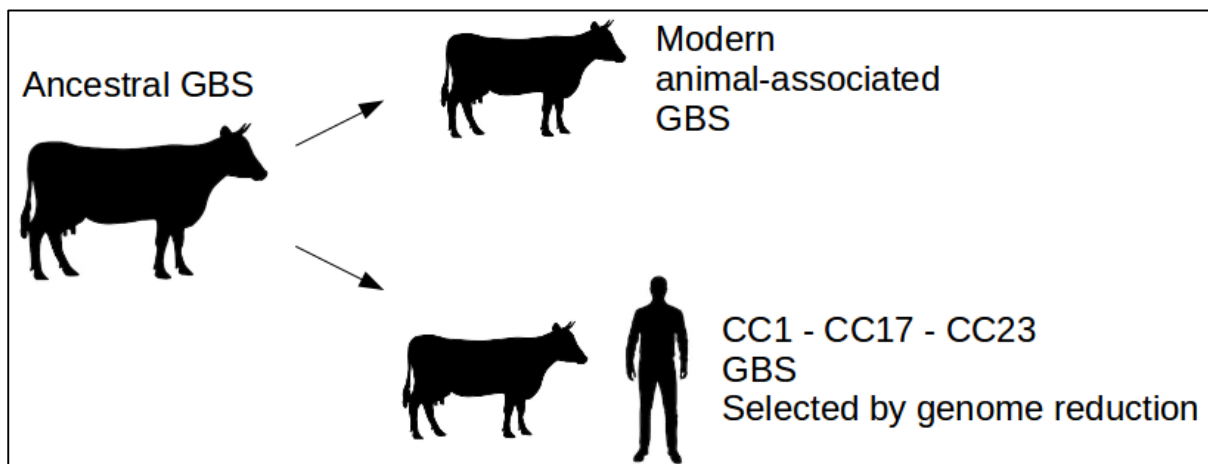

545

546 **Figure 4 – Hypothesis: a model for the differentiation of GBS into animal- and human- associated strains.**

547 The ancestral GBS strains carried every gene present in each of the modern clonal complex. Modern animal  
548 strains, cluster in a single clade characterised by a very high variability and deep branching. Modern human and  
549 animal strains belonging to CC1 (including CC10 and CC19), CC23 and CC17 have differentiated by genome  
550 reduction and clonal expansion. Hypervirulent clones (e.g. CC17) retained genes useful for the colonisation of  
551 the human niche.

552

553 Our analysis has a number of limitations. Firstly, we were confined to the current publicly  
554 available GBS human and animal genomes retrieved from [pubmlst.org/sagalactiae/](http://pubmlst.org/sagalactiae/) (a total of  
555 3028 isolates including the full dataset from The Netherlands), plus a further 303 genomes

556 from Malawi. Secondly, the GWAS pipeline we used relies on the automated annotation of  
557 software Prokka. The use of this software required the use of Roary and Scoary to produce  
558 the pangenome and the pan-GWAS. This was extremely efficient when used to annotate the  
559 thousands of bacterial genomes in this analysis, and although the genome annotations and the  
560 pan-genome were manually screened for consistency and quality (such as saturation of the  
561 core and accessory genome), it could potentially introduce artefacts. Confirming the GWAS  
562 findings with the sequence alignments allowed us to identify several genes that were  
563 characterised by non-synonymous mutations and small in-dels, as well as it unravelled these  
564 potential artefacts that require further investigation. Finally, our analysis is confined to the  
565 genomic differences between the different clades, further laboratory and epidemiological  
566 analysis will be needed to fully appreciate the biological consequences of these CC-specific  
567 genes.

568

569 In conclusion, we have shown that the CCs of *Streptococcus agalactiae* responsible for  
570 neonatal meningitis and adult colonisation are characterised by the presence of specific gene  
571 sets that are not limited to particular geographical areas. We suggest that human-associated  
572 GBS CCs have largely evolved in the animal host before spreading clonally to the human,  
573 enabled by functionally different sets of CC-specific genes which enable niche adaptation. In  
574 the context of GBS control measures such as vaccination, we speculate that as the human  
575 gastrointestinal and urogenital niches are vacated by vaccine serotypes, serotype-replacement  
576 could occur as a result of new GBS strains arising from animals including cattle and fish,  
577 reservoirs of GBS genetic diversity.

578

## 579 **ACKNOWLEDGEMENTS**

580 The authors would like to thank all the clinical and laboratory staff at the MLW Clinical  
581 Research Programme in Malawi and all families and their infants who participated in the  
582 study.

583

## 584 **FUNDING**

585 This work was funded by a project grant from the Meningitis Research Foundation (Grant  
586 0801.0); a project grant jointly funded by the UK Medical Research Council (MRC) and the  
587 UK Department for International Development (DFID) under the MRC/DFID Concordat  
588 agreement and is also part of the EDCTP2 programme supported by the European Union  
589 (MR/N023129/1); and a recruitment award from the Wellcome Trust (Grant 106846/Z/15/Z).

590 The MLW Clinical Research Programme is supported by a Strategic Award from the  
591 Wellcome Trust, UK. The NIHR Global Health Research Unit on Mucosal Pathogens at UCL  
592 was commissioned by the National Institute for Health Research using Official Development  
593 Assistance (ODA) funding.

594

#### 595 **DISCLAIMER**

596 The views expressed are those of the author and not necessarily those of the NHS, the NIHR  
597 or the Department of Health and Social Care.

598

#### 599 **SUPPLEMENTARY MATERIAL**

600 **Table S1 – Metadata of each GBS isolate described in this work.** From left to right each column shows the  
601 isolate name, the clonal complex to which the isolate belongs (CC1, CC6, CC10, CC19, CC17, CC23, Single ST  
602 or N/D), the source of isolation (animal or human, in which case it is reported as carrier, invasive or unknown),  
603 the country of isolation, the serotype, the year of isolation (where available), the MLST-type, and the accession  
604 number of each isolate (where available).

605

606 **Table S2 – Sequence type defining each clonal complex and number of STs isolated per country.** The table  
607 is divided in 8 horizontal sectors (CC1, CC6, CC10, CC19, CC17, CC23, Single ST or N/D). In each sector  
608 columns show (from left to right) which ST is represented in each CC, number of isolates belonging to a  
609 particular ST are found in each of the country where the isolated described in this study were sourced (Brazil,  
610 Canada, Germany, Italy, Kenya, Malawi, Netherlands, USA or unknown source).

611

612 **Table S3 – Genes defining each CC as identified by pan-GWAS.** The table is divided in five sections,  
613 relative to CC1, CC10, CC19, CC17 and CC23. Each column shows (from left to right) the name of the gene  
614 identified by pan-GWAS, the length of the putative protein produced by each gene, the KEGG database id  
615 (where available), a short annotation of each gene (according to KEGG and/or Prokka where available,  
616 otherwise reported as hypothetical protein), the functional class to which each gene belongs (metabolic –  
617 reported as “met”, environmental information processing - “env” or cellular processes - “cell”, according to  
618 KEGG annotation, the type of variation between different clonal complexes (“Point mutations”, “Synonymous  
619 point mutations”, “Truncated protein”, “Gene absent”).

620 In case both prokka and KEGG annotation did not report a gene name, an arbitrary gene name was assigned to  
621 the hypothetical gene following the scheme, “g”, followed by the clonal complex and an incremental number.

622

623

#### 624 **Figure S1 - Core genome based population structure of GBS built with alternative reference strains.**

625 Trees showing the GBS population structure as in figure 1, produced with a different reference strain. Reference  
626 strains used for the four trees are: NC\_021485 – strain 09mas018883; NC\_007432 – strain A909; NC\_018646 -

627 strain GD201008; NC\_004368 – strain NEM316. For each tree, the annotation is analogous to the one described  
628 in figure 1.

629

630 **Figure S2 – Heatmaps based on the BLASTn score of each CC-characterising gene for each isolate.**

631 Heatmaps were produced with pheatmap package in R (clustering of rows and column was performed using  
632 Euclidean method). Each heatmap shows 1988 isolates on the rows and the CC-associated genes on the column.  
633 Each row-clustering tree (related to the isolates) is annotated with coloured strips representing the Clonal  
634 complex. Strains belonging to CC10-ST327 and CC10-ST328 are reported as CC327 in this representation

635

636 **Figure S3 – Syntheny of CC17 characterising genes.** The image shows the alignment of three CC17 *S.*

637 *agalactiae* genomes (strain 874391, BM110 and SGM6) and 104 CC17-associated genes (at the bottom). Each  
638 vertical line represents a sequence that is found in the same location in all the analysed sequence. Image  
639 obtained with software Mauve.

640

641 **Figure S4 – Genes showing alleles statistically associated with carriage or invasive disease in CC17 strains.**

642 Each barplot shows the frequency of each allele in each of the 21 CC17-associated gene observed to have at  
643 least one allele associated with disease or carriage. Different numbers on the x-axis represent different allelic  
644 configuration of the gene. P-value < 0.05. \* = Non-significant.

645

646 **Supplementary File 1 – Representative sequences CC-specific genes.**

647

648

649 **BIBLIOGRAPHY**

- 650 1. Abranches, J., Chen, Y.-Y. M., & Burne, R. A. (2004). Galactose metabolism by  
651 *Streptococcus mutans*. *Applied and Environmental Microbiology*, 70(10), 6047–52.  
652
- 653 2. Alikhan, N.-F., Petty, N. K., Ben Zakour, N. L., & Beatson, S. A. (2011). BLAST  
654 Ring Image Generator (BRIG): simple prokaryote genome comparisons. *BMC*  
655 *Genomics*, 12, 402.  
656
- 657 3. Almeida, A., Rosinski-Chupin, I., Plainvert, C., Douarre, P.-E., Borrego, M. J.,  
658 Poyart, C., & Glaser, P. (2017). Parallel Evolution of Group B Streptococcus  
659 Hypervirulent Clonal Complex 17 Unveils New Pathoadaptive Mutations. *mSystems*,  
660 2(5).  
661
- 662 4. Almeida, A., Villain, A., Joubrel, C., Touak, G., Sauvage, E., Rosinski-Chupin, I., ...  
663 Glaser, P. (2015). Whole-Genome Comparison Uncovers Genomic Mutations



- 664           between Group B Streptococci Sampled from Infected Newborns and Their Mothers.  
665           Journal of Bacteriology, 197(20), 3354–66.  
666
- 667           5. Alvarez-Martinez, C. E., & Christie, P. J. (2009). Biological diversity of prokaryotic  
668           type IV secretion systems. *Microbiology and Molecular Biology Reviews: MMBR*,  
669           73(4), 775–808.  
670
- 671           6. Anbukkarasi, K., Nanda, D. K., UmaMaheswari, T., Hemalatha, T., Singh, P., &  
672           Singh, R. (2014). Assessment of expression of Leloir pathway genes in wild-type  
673           galactose-fermenting *Streptococcus thermophilus* by real-time PCR. *European Food*  
674           *Research and Technology*, 239(5), 895–903.  
675
- 676           7. Bankevich, A., Nurk, S., Antipov, D., Gurevich, A. A., Dvorkin, M., Kulikov, A.  
677           S., ... Pevzner, P. A. (2012). SPAdes: A New Genome Assembly Algorithm and Its  
678           Applications to Single-Cell Sequencing. *Journal of Computational Biology*, 19(5),  
679           455–477.  
680
- 681           8. Berardi, A., Rossi, C., Lugli, L., Creti, R., Bacchi Reggiani, M. L., Lanari, M., ...  
682           Ferrari, F. (2013). Group B Streptococcus Late-Onset Disease: 2003-2010.  
683           *PEDIATRICS*, 131(2), e361–e368.  
684
- 685           9. Berg, B. R., Houseman, J. L., terSteege, Z. E., LeBar, W. D., & Newton, D. W. (2014).  
686           Antimicrobial susceptibilities of group B streptococcus isolates from prenatal  
687           screening samples. *Journal of Clinical Microbiology*, 52(9), 3499–500.  
688
- 689           10. Bolger, A. M., Lohse, M., & Usadel, B. (2014). Trimmomatic: a flexible trimmer for  
690           Illumina sequence data. *Bioinformatics*, 30(15), 2114–2120.  
691
- 692           11. Botelho, A. C. N., Ferreira, A. F. M., Fracalanza, S. E. L., Teixeira, L. M., & Pinto,  
693           T. C. A. (2018). A Perspective on the Potential Zoonotic Role of *Streptococcus*  
694           *agalactiae*: Searching for a Missing Link in Alternative Transmission Routes.  
695           *Frontiers in Microbiology*, 9, 608.  
696

- 697 12. Bray, B. A., Sutcliffe, I. C., & Harrington, D. J. (2009). Expression of the MtsA  
698 lipoprotein of *Streptococcus agalactiae* A909 is regulated by manganese and iron.  
699 *Antonie van Leeuwenhoek*, 95(1), 101–109.  
700
- 701 13. Brynildsrud, O., Bohlin, J., Scheffer, L., & Eldholm, V. (2016). Rapid scoring of  
702 genes in microbial pan-genome-wide association studies with Scoary. *Genome*  
703 *Biology*, 17(1), 238.  
704
- 705 14. Buscetta, M., Papasergi, S., Firon, A., Pietrocola, G., Biondo, C., Mancuso, G., ...  
706 Beninati, C. (2014). FbsC, a novel fibrinogen-binding protein, promotes  
707 *Streptococcus agalactiae*-host cell interactions. *The Journal of Biological Chemistry*,  
708 289(30), 21003–21015.  
709
- 710 15. Carvalho, S. M., Kloosterman, T. G., Kuipers, O. P., & Neves, A. R. (2011). CcpA  
711 ensures optimal metabolic fitness of *Streptococcus pneumoniae*. *PLoS ONE*, 6(10),  
712 e26707.  
713
- 714 16. Chan, W. T., Yeo, C. C., Sadowy, E., & Espinosa, M. (2014). Functional validation of  
715 putative toxin-antitoxin genes from the Gram-positive pathogen *Streptococcus*  
716 *pneumoniae*: phd-doc is the fourth bona-fide operon. *Frontiers in Microbiology*, 5,  
717 677.  
718
- 719 17. Chang, C. C., Chow, C. C., Tellier, L. C., Vattikuti, S., Purcell, S. M., & Lee, J. J.  
720 (2015). Second-generation PLINK: rising to the challenge of larger and richer  
721 datasets. *GigaScience*, 4, 7.  
722
- 723 18. Chen, P. E., & Shapiro, B. J. (2015). The advent of genome-wide association studies  
724 for bacteria. *Current Opinion in Microbiology*, 25, 17–24.  
725
- 726 19. Cheng, Q., Stafslie, D., Purushothaman, S. S., & Cleary, P. (2002). The group B  
727 streptococcal C5a peptidase is both a specific protease and an invasin. *Infection and*  
728 *Immunity*, 70(5), 2408–13.  
729

- 730 20. Da Cunha, V., Davies, M. R., Douarre, P.-E., Rosinski-Chupin, I., Margarit, I.,  
731 Spinali, S., ... Glaser, P. (2014). *Streptococcus agalactiae* clones infecting humans  
732 were selected and fixed through the extensive use of tetracycline. *Nature*  
733 *Communications*, 5, 4544.
- 734 21. Dagneu, A. F., Cunnington, M. C., Dube, Q., Edwards, M. S., French, N.,  
735 Heyderman, R. S., ... Clemens, S. A. C. (2012). Variation in reported neonatal group  
736 B streptococcal disease incidence in developing countries. *Clinical Infectious*  
737 *Diseases*. Oxford University Press.
- 738 22. Darling, A. C. E., Mau, B., Blattner, F. R., & Perna, N. T. (2004). Mauve: multiple  
739 alignment of conserved genomic sequence with rearrangements. *Genome Research*,  
740 14(7), 1394–403.
- 741 23. Darling, A. E., Mau, B., & Perna, N. T. (2010). progressiveMauve: multiple genome  
742 alignment with gene gain, loss and rearrangement. *PloS One*, 5(6), e11147.
- 743 24. Dermer, P., Lee, C., Eggert, J., & Few, B. (2004). A history of neonatal group B  
744 streptococcus with its related morbidity and mortality rates in the United States.  
745 *Journal of Pediatric Nursing*, 19(5), 357–363.
- 746 25. Edmond, K. M., Kortsalioudaki, C., Scott, S., Schrag, S. J., Zaidi, A. K., Cousens, S.,  
747 & Heath, P. T. (2012). Group B streptococcal disease in infants aged younger than 3  
748 months: Systematic review and meta-analysis. *The Lancet*, 379(9815), 547–556.
- 749 26. Enright, M. C., Robinson, D. A., Randle, G., Feil, E. J., Grundmann, H., & Spratt, B.  
750 G. (2002). The evolutionary history of methicillin-resistant *Staphylococcus aureus*  
751 (MRSA). *Proceedings of the National Academy of Sciences of the United States of*  
752 *America*, 99(11), 7687–92.
- 753 27. Flores, A. R., Galloway-Peña, J., Sahasrabhojane, P., Saldaña, M., Yao, H., Su, X., ...  
754 Shelburne, S. A. (2015). Sequence type 1 group B *Streptococcus*, an emerging cause  
755 of invasive disease in adults, evolves by small genetic changes. *Proceedings of the*  
756 *National Academy of Sciences of the United States of America*, 112(20), 6431–6.

764

765 28. Harding, R. M., Ward, P. N., Coffey, T. J., ... Jones, N. (2004). Hyperinvasive  
766 neonatal group B streptococcus has arisen from a bovine ancestor. *Journal of Clinical*  
767 *Microbiology*, 42(5), 2161–7.

768

769 29. Heyderman RS, Madhi SA, French N, Cutland C, Ngwira B, Kayambo D, *et al.*  
770 (2016). Group B streptococcus vaccination in pregnant women with or without HIV  
771 in Africa: a non-randomised phase 2, open-label, multicentre trial. *Lancet Infect*  
772 *Dis.*;16(5):546-55.

773

774 30. Jamrozy, D., Goffau, M. C. de, Bijlsma, M. W., Beek, D. van de, Kuijpers, T. W.,  
775 Parkhill, J., ... Bentley, S. D. (2018). Temporal population structure of invasive  
776 Group B Streptococcus during a period of rising disease incidence shows expansion  
777 of a CC17 clone. *bioRxiv*, 447037. <https://doi.org/10.1101/447037>

778

779 31. Janulczyk, R., Ricci, S., & Björck, L. (2003). MtsABC is important for manganese  
780 and iron transport, oxidative stress resistance, and virulence of *Streptococcus*  
781 *pyogenes*. *Infection and Immunity*, 71(5), 2656–64.

782

783 32. Jolley, K. A., & Maiden, M. C. (2010). BIGSdb: Scalable analysis of bacterial  
784 genome variation at the population level. *BMC Bioinformatics*, 11(1), 595.

785

786 33. Kehl-Fie, T. E., Zhang, Y., Moore, J. L., Farrand, A. J., Hood, M. I., Rathi, S., ...  
787 Skaar, E. P. (2013). MntABC and MntH contribute to systemic *Staphylococcus*  
788 *aureus* infection by competing with calprotectin for nutrient manganese. *Infection and*  
789 *Immunity*, 81(9), 3395–405.

790

791 34. Kehl-Fie, T.E., Zhang, Y., Moore, J.L., Farrand, A.J., Hood, M.I., Rathi, S., Chazin,  
792 W.J., Caprioli, R.M., Skaar, E.P. (2013). MntABC and MntH contribute to systemic  
793 *Staphylococcus aureus* infection by competing with calprotectin for nutrient  
794 manganese. *Infection and Immunity*, 81(9), 3395–405.

795

- 796 35. Konto-Ghiorghi, Y., Mairey, E., Mallet, A., Duménil, G., Caliot, E., Trieu-Cuot, P., &  
797 Dramsi, S. (2009). Dual role for pilus in adherence to epithelial cells and biofilm  
798 formation in *Streptococcus agalactiae*. *PLoS Pathogens*, 5(5), e1000422.  
799
- 800 36. Lalioui, L., Pellegrini, E., Dramsi, S., Baptista, M., Bourgeois, N., Doucet-Populaire,  
801 F., ... Trieu-Cuot, P. (2005). The SrtA Sortase of *Streptococcus agalactiae* is required  
802 for cell wall anchoring of proteins containing the LPXTG motif, for adhesion to  
803 epithelial cells, and for colonization of the mouse intestine. *Infection and Immunity*,  
804 73(6), 3342–50.  
805
- 806 37. Lamy, M.-C., Dramsi, S., Billoët, A., Régliez-Poupet, H., Tazi, A., Raymond, J., ...  
807 Poyart, C. (2006). Rapid detection of the “highly virulent” group B streptococcus ST-  
808 17 clone. *Microbes and Infection*, 8(7), 1714–1722.  
809
- 810 38. Landwehr-Kenzel, S., & Henneke, P. (2014). Interaction of *Streptococcus agalactiae*  
811 and Cellular Innate Immunity in Colonization and Disease. *Frontiers in Immunology*,  
812 5, 519.  
813
- 814 39. Lees, J. A., Vehkala, M., Välimäki, N., Harris, S. R., Chewapreecha, C., Croucher, N.  
815 J., ... Corander, J. (2016). Sequence element enrichment analysis to determine the  
816 genetic basis of bacterial phenotypes. *Nature Communications*, 7, 12797.  
817
- 818 40. Lemire, P., Houde, M., Lecours, M.-P., Fittipaldi, N., & Segura, M. (2012). Role of  
819 capsular polysaccharide in Group B Streptococcus interactions with dendritic cells.  
820 *Microbes and Infection*, 14(12), 1064–1076.  
821
- 822 41. Letunic, I. and Bork, P. (2016) Interactive Tree Of Life (iTOL) v3: an online tool for  
823 the display and annotation of phylogenetic and other trees. *Nucleic Acids Research*  
824 44,42-45  
825
- 826 42. Lier, C., Baticle, E., Horvath, P., Haguenoer, E., Valentin, A.-S., Glaser, P., ...  
827 Lanotte, P. (2015). Analysis of the type II-A CRISPR-Cas system of *Streptococcus*  
828 *agalactiae* reveals distinctive features according to genetic lineages. *Frontiers in*  
829 *Genetics*, 6, 214.

830

831 43. Lindahl, G., Stålhammar-Carlemalm, M., & Areschoug, T. (2005). Surface proteins of  
832 *Streptococcus agalactiae* and related proteins in other bacterial pathogens. *Clinical*  
833 *Microbiology Reviews*, 18(1), 102–27.

834

835 44. Lyhs, U., Kulkas, L., Katholm, J., Waller, K. P., Saha, K., Tomusk, R. J., & Zadoks,  
836 R. N. (2016). *Streptococcus agalactiae* Serotype IV in Humans and Cattle, Northern  
837 Europe1. *Emerging Infectious Diseases*, 22(12), 2097–2103.

838

839 45. Manning, S. D., Lewis, M. A., Springman, A. C., Lehotzky, E., Whittam, T. S., &  
840 Davies, H. D. (2008). Genotypic Diversity and Serotype Distribution of Group B  
841 *Streptococcus* Isolated from Women Before and After Delivery. *Clinical Infectious*  
842 *Diseases*, 46(12), 1829–1837.

843

844 46. Manning, S. D., Springman, A. C., Million, A. D., Milton, N. R., McNamara, S. E.,  
845 Somsel, P. A., ... Davies, H. D. (2010). Association of Group B *Streptococcus*  
846 Colonization and Bovine Exposure: A Prospective Cross-Sectional Cohort Study.  
847 *PLoS ONE*, 5(1), e8795.

848

849 47. Meyn L. A., Krohn M. A., Hillier S. L. (2009). Rectal colonization by group B  
850 *Streptococcus* as a predictor of vaginal colonization. *American Journal of Obstetrical*  
851 *Gynecology*. 201, 76.e1–76.e7.

852

853 48. Moellering, R. C. (2005). Vancomycin: A 50-Year Reassessment. *Clinical Infectious*  
854 *Diseases*, 42, S3–S4.

855

856 49. Nishihara Y, Dangor Z, French N, Madhi S, Heyderman R. (2017) Challenges in  
857 reducing group B *Streptococcus* disease in African settings. *Archives of Disease in*  
858 *Childhood*. 102(1):72-7.

859

860 50. Nobbs, A. H., Lamont, R. J., & Jenkinson, H. F. (2009). *Streptococcus* Adherence and  
861 Colonization. *Microbiology and Molecular Biology Reviews*, 73(3), 407–450.

862

- 863 51. Obolski, U., Gori, A., Lourenço, J., Thompson, C., Thompson, R., French, N.,  
864 Heyderman, R. S., Gupta, S. (2019). Identifying genes associated with invasive  
865 disease in *S. pneumoniae* by applying a machine learning approach to whole genome  
866 sequence typing data. *Scientific Reports*, 9(1), 4049.  
867
- 868 52. Page, A. J., Cummins, C. A., Hunt, M., Wong, V. K., Reuter, S., Holden, M. T. G., ...  
869 Parkhill, J. (2015). Roary: rapid large-scale prokaryote pan genome analysis.  
870 *Bioinformatics (Oxford, England)*, 31(22), 3691–3.  
871
- 872 53. Paterson, G. K., Blue, C. E., & Mitchell, T. J. (2006). Role of two-component systems  
873 in the virulence of *Streptococcus pneumoniae*. *Journal of Medical Microbiology*,  
874 55(4), 355–363.  
875
- 876 54. Patras, K. A., Wang, N.-Y., Fletcher, E. M., Cavaco, C. K., Jimenez, A., Garg, M., ...  
877 Doran, K. S. (2013). Group B Streptococcus CovR regulation modulates host immune  
878 signalling pathways to promote vaginal colonization. *Cellular Microbiology*, 15(7),  
879 1154–67.  
880
- 881 55. Patras, K. A., Derieux, J., Al-Bassam, M. M., Adiletta, N., Vrbanac, A., Lapek, J.  
882 D., ... Nizet, V. (2018). Group B Streptococcus Biofilm Regulatory Protein A  
883 Contributes to Bacterial Physiology and Innate Immune Resistance. *Journal of*  
884 *Infectious Diseases*, 218(10), 1641–1652.  
885
- 886 56. Périchon, B., Szili, N., Du Merle, L., Rosinski-Chupin, I., Gominet, M., Bellais, S., ...  
887 Dramsi, S. (2017). Regulation of PI-2b pilus expression in hypervirulent  
888 *Streptococcus agalactiae* ST-17 BM110. *PLoS ONE*, 12(1), e0169840.  
889
- 890 57. Price, M. N., Dehal, P. S., & Arkin, A. P. (2010). FastTree 2 – Approximately  
891 Maximum-Likelihood Trees for Large Alignments. *PLoS ONE*, 5(3), e9490.  
892
- 893 58. Rajagopal, L. (2009). Understanding the regulation of Group B Streptococcal  
894 virulence factors. *Future Microbiology*, 4(2), 201–221.  
895

- 896 59. Remy, L., Carrière, M., Derré-Bobillot, A., Martini, C., Sanguinetti, M., & Borezée-  
897 Durant, E. (2013). The *Staphylococcus aureus* Opp1 ABC transporter imports nickel  
898 and cobalt in zinc-depleted conditions and contributes to virulence. *Molecular*  
899 *Microbiology*, 87(4), 730–743.
- 900  
901 60. Romero-Hernández, B., Tedim, A. P., Sánchez-Herrero, J. F., Librado, P., Rozas, J.,  
902 Muñoz, G., ... Del Campo, R. (2015). *Streptococcus gallolyticus* subsp. *gallolyticus*  
903 from human and animal origins: Genetic diversity, antimicrobial susceptibility, and  
904 characterization of a vancomycin-resistant calf isolate carrying a *vanA*-Tn1546-like  
905 element. *Antimicrobial Agents and Chemotherapy*, 59(4), 2006–2015.
- 906  
907 61. Rosini, R., & Margarit, I. (2015). Biofilm formation by *Streptococcus agalactiae*:  
908 influence of environmental conditions and implicated virulence factors. *Frontiers in*  
909 *Cellular and Infection Microbiology*, 5, 6.
- 910  
911 62. Rosinski-Chupin, I., Sauvage, E., Mairey, B., Mangenot, S., Ma, L., Da Cunha, V., ...  
912 Glaser, P. (2013). Reductive evolution in *Streptococcus agalactiae* and the emergence  
913 of a host adapted lineage. *BMC Genomics*, 14, 252.
- 914  
915 63. Russell, N. J., Seale, A. C., O’Driscoll, M., O’Sullivan, C., Bianchi-Jassir, F.,  
916 Gonzalez-Guarin, J., ... Majumder, S. (2017). Maternal Colonization With Group B  
917 *Streptococcus* and Serotype Distribution Worldwide: Systematic Review and Meta-  
918 analyses. *Clinical Infectious Diseases*, 65(suppl\_2), S100–S111.
- 919  
920 64. Santi, I., Grifantini, R., Jiang, S.-M., Brettoni, C., Grandi, G., Wessels, M. R., &  
921 Soriani, M. (2009). CsrRS regulates group B *Streptococcus* virulence gene expression  
922 in response to environmental pH: a new perspective on vaccine development. *Journal*  
923 *of Bacteriology*, 191(17), 5387–97.
- 924  
925 65. Santi, I., Scarselli, M., Mariani, M., Pezzicoli, A., Massignani, V., Taddei, A., ...  
926 Soriani, M. (2007). BibA: a novel immunogenic bacterial adhesin contributing to  
927 group B *Streptococcus* survival in human blood. *Molecular Microbiology*, 63(3),  
928 754–767.
- 929



- 930 66. Seale, A. C., Koech, A. C., Sheppard, A. E., Barsosio, H. C., Langat, J., Anyango,  
931 E., ... Berkley, J. A. (2016). Maternal colonization with *Streptococcus agalactiae* and  
932 associated stillbirth and neonatal disease in coastal Kenya. *Nature Microbiology*, 1(7),  
933 16067.  
934
- 935 67. Seemann, T. (2014). Prokka: rapid prokaryotic genome annotation. *Bioinformatics*  
936 (Oxford, England), 30(14), 2068–9.  
937
- 938 68. Shabayek S, Spellerberg B. (2018). Group B Streptococcal Colonization, Molecular  
939 Characteristics, and Epidemiology. *Frontiers in Microbiology*.; 9:437.  
940
- 941 69. Slotved, H.-C., Kong, F., Lambertsen, L., Sauer, S., & Gilbert, G. L. (2007). Serotype  
942 IX, a Proposed New *Streptococcus agalactiae* Serotype. *Journal of Clinical*  
943 *Microbiology*, 45(9), 2929–36.  
944
- 945 70. Smith, A. W., Roche, H., Trombe, M.-C., Briles, D. E., & Håkansson, A. (2002).  
946 Characterization of the dihydrolipoamide dehydrogenase from *Streptococcus*  
947 *pneumoniae* and its role in pneumococcal infection. *Molecular Microbiology*, 44(2),  
948 431–448.  
949
- 950 71. Sørensen, U. B. S., Poulsen, K., Ghezzi, C., Margarit, I., & Kilian, M. (2010).  
951 Emergence and global dissemination of host-specific *Streptococcus agalactiae* clones.  
952 *mBio*, 1(3).  
953
- 954 72. Teatero, S., Ferrieri, P., Martin, I., Demczuk, W., McGeer, A., & Fittipaldi, N. (2017).  
955 Serotype Distribution, Population Structure, and Antimicrobial Resistance of Group B  
956 *Streptococcus* Strains Recovered from Colonized Pregnant Women. *Journal of*  
957 *Clinical Microbiology*, 55(2), 412–422.  
958
- 959 73. Teatero, S., McGeer, A., Low, D. E., Li, A., Demczuk, W., Martin, I., & Fittipaldi, N.  
960 (2014). Characterization of invasive group B streptococcus strains from the greater  
961 Toronto area, Canada. *Journal of Clinical Microbiology*, 52(5), 1441–7.  
962

- 963 74. Teatero, S., McGeer, A., Low, D. E., Li, A., Demczuk, W., Martin, I., & Fittipaldi, N.  
964 (2014). Characterization of invasive group B streptococcus strains from the greater  
965 Toronto area, Canada. *Journal of Clinical Microbiology*, 52(5), 1441–7.  
966
- 967 75. Thornton, T., & McPeck, M. S. (2010). ROADTRIPS: case-control association testing  
968 with partially or completely unknown population and pedigree structure. *American*  
969 *Journal of Human Genetics*, 86(2), 172–84.  
970
- 971 76. Treangen, T. J., Ondov, B. D., Koren, S., & Phillippy, A. M. (2014). The Harvest  
972 suite for rapid core-genome alignment and visualization of thousands of intraspecific  
973 microbial genomes. *Genome Biology*, 15(11), 524.  
974
- 975 77. Vaillancourt, K., Moineau, S., Frenette, M., Lessard, C., & Vadeboncoeur, C. (2002).  
976 Galactose and lactose genes from the galactose-positive bacterium *Streptococcus*  
977 *salivarius* and the phylogenetically related galactose-negative bacterium  
978 *Streptococcus thermophilus*: organization, sequence, transcription, and activity of the  
979 *gal* gene products. *Journal of Bacteriology*, 184(3), 785–93.  
980
- 981 78. Van Melderren, L. (2010). Toxin–antitoxin systems: why so many, what for? *Current*  
982 *Opinion in Microbiology*, 13(6), 781–785.  
983
- 984 79. Wallden, K., Rivera-Calzada, A., & Waksman, G. (2010). Microreview: Type IV  
985 secretion systems: versatility and diversity in function. *Cellular Microbiology*, 12(9),  
986 1203–1212.  
987
- 988 80. Wood, D. E., & Salzberg, S. L. (2014). Kraken: ultrafast metagenomic sequence  
989 classification using exact alignments. *Genome Biology*, 15(3), R46.  
990
- 991 81. Xia, F. Di, Mallet, A., Caliot, E., Gao, C., Trieu-Cuot, P., & Dramsi, S. (2015).  
992 Capsular polysaccharide of Group B *Streptococcus* mediates biofilm formation in the  
993 presence of human plasma. *Microbes and Infection*, 17(1), 71–76.  
994
- 995 82. Zadoks, R. N., Middleton, J. R., McDougall, S., Katholm, J., & Schukken, Y. H.  
996 (2011). *Molecular Epidemiology of Mastitis Pathogens of Dairy Cattle and*

997 Comparative Relevance to Humans. *Journal of Mammary Gland Biology and*  
998 *Neoplasia*, 16(4), 357–372.

999

1000 83. Zhang, W., Rong, C., Chen, C., & Gao, G. F. (2012). Type-IVC Secretion System: A  
1001 Novel Subclass of Type IV Secretion System (T4SS) Common Existing in Gram-  
1002 Positive Genus *Streptococcus*. *PLoS ONE*, 7(10), e46390.

1003

1004

1005

1006

1007
